# Supplementary material for: Spatial–temporal evolution and associated factors of older adult care institutions in Shanghai
Source: Front Public Health. 2025 Jul 3;13:1598394. doi: 10.3389/fpubh.2025.1598394 (PMC12267019; doi:10.3389/fpubh.2025.1598394)
Supplement: Supplementary file 1 [file Data_Sheet_1.xlsx]

## Sheet: District Data
1. Eldercare Quantities and Degree of Aging
	2000	2001	2002	2003	2004	2005	2006	2007	2008	2009	2010	2011	2012	2013	2014	2015	2016	2017	2018	2019	2020
Public elderly care institutions	157	279	338	391	431	451	474	496	508	516	531	538	546	559	572	583	589	603	619	631	634
Citizen run elderly care institutions	78	108	132	164	188	235	283	312	327	352	380	402	428	447	469	489	521	555	597	628	638
The proportion of population aged 60 and above	18.31	18.58	18.7	18.98	19.2827	19.5823	20.1465	20.802	21.6076	22.5387	23.438	24.5012	25.742	27.062	28.7748	30.212	31.5724	33.0974	34.3297	35.1562	36.0932
The proportion of population aged 80 and above	2.27	2.49	2.64	2.8	3.01	3.22	3.41	3.64	3.84	4.04	4.24	4.43	4.7	5	5.24	5.41	5.49379	5.53765	5.58473	5.57247	5.58356
2. Number of Eldercare Institutions in Each District
	Eldercare Institutions
	2000		2010		2020				Inner Ring	Outer Ring	Suburban Ring	Total
	Public	Private	Public	Private	Public	Private		2000	44	118	171	235
Baoshan District	3	8	32	31	40	61		2010	173	475	696	911
Chongming County	16	1	39	15	45	24		2020	240	670	999	1272
Fengxian District	11	1	36	16	47	26
Hongkou District	1	2	17	15	25	32
Huangpu District	8	7	57	26	73	36
Jiading District	3	2	30	12	33	22
Jinshan District	21	3	29	11	34	16
Jing’an District	3	5	28	21	34	32
Minhang District	8	7	26	27	35	51
Pudong New Area	24	23	68	107	76	145
Putuo District	13	1	33	12	38	27
Qingpu District	8	1	23	8	26	20
Songjiang District	13	1	26	6	27	16
Xuhui District	12	5	25	17	29	30
Yangpu District	7	11	34	41	40	70
Changning District	6	0	28	15	32	30
3. C and M Indices
C					M
	2005	2020
Pudong New Area	1.00131	0.901826		2005	0.0147759
Huangpu District	1.37115	1.40405		2006	0.0136919
Xuhui District	0.622932	0.739104		2007	0.0123316
Changning District	0.980222	1.15983		2008	0.0118028
Jing’an District	0.551294	0.762774		2009	0.011535
Putuo District	0.83772	0.74323		2010	0.0116085
Hongkou District	0.497206	0.810936		2011	0.0115768
Yangpu District	0.950697	1.12525		2012	0.011035
Baoshan District	1.18524	1.11769		2013	0.0114012
Minhang District	0.994989	0.94546		2014	0.0110082
Jiading District	1.26657	0.981181		2015	0.0110859
Jinshan District	1.33895	1.17812		2016	0.0106613
Songjiang District	1.18035	0.8968		2017	0.0106578
Qingpu District	1.19053	1.16785		2018	0.0105423
Fengxian District	1.69007	1.63552		2019	0.0107213
Chongming County	1.207	1.10921		2020	0.0110082

## Sheet: Influencing Factors
4. Influencing Factors
Global Moran's I Analysis
Year	Moran’s I Index	Expected Index	Variance	z-score	p-value
2000	0.055906	-0.004608	0.000136	5.18698	0
2010	0.067681	-0.004608	0.000115	6.75534	0
2020	0.09423	-0.004608	0.000113	9.27979	0
2020 Influencing Factors by Subdistrict
Name	Eldercare Institutions	Transportation	Shopping	Housing	Healthcare	Parks
Situan Town	2	93	23	24	20	6
Jinhui Town	15	134	45	52	28	10
Haiwan Town	5	77	9	39	4	12
Fengpu Community	3	69	22	72	11	5
Shanghai Port Comprehensive Economic Development Zone	1	4	5	6	3	1
Shanghai Haiwan Tourism Area, Fengxian District	1	48	23	44	9	12
Nanqiao Town	10	312	113	233	56	31
Zhuanghang Town	8	92	17	18	9	18
Zhelin Town	3	139	31	35	25	13
Qingcun Town	5	139	29	32	24	16
Jinhai Community	0	38	5	23	4	2
Fengcheng Town	11	204	70	70	45	22
Liangcheng Xincun Subdistrict	3	27	18	103	24	4
Jiaxing Road Subdistrict	8	25	24	156	25	7
Tilanqiao Subdistrict	3	52	28	182	34	30
Jiangwan Town Subdistrict	13	23	18	161	34	10
Guangzhong Road Subdistrict	7	20	35	181	40	4
Sichuan North Road Subdistrict	6	31	43	194	58	56
Quyang Road Subdistrict	8	40	23	110	35	4
Ouyang Road Subdistrict	3	13	7	123	17	7
East Nanjing Road Subdistrict	1	51	40	157	35	48
The Bund Subdistrict	39	43	41	130	32	142
Laoximen Subdistrict	2	13	12	108	38	17
Wuliqiao Subdistrict	12	25	15	137	34	10
Dapuqiao Subdistrict	1	16	18	133	38	26
Xiaodongmen Subdistrict	15	18	7	88	12	19
Yuyuan Subdistrict	1	15	34	114	14	32
Middle Huaihai Road Subdistrict	6	35	40	105	45	30
Bansongyuan Road Subdistrict	10	27	31	133	41	8
Ruijin Second Road Subdistrict	0	16	18	217	41	60
Huating Town	3	45	17	8	13	7
Jiuyuan New District Administrative Committee	1	74	25	70	16	14
Jiading Town Subdistrict	0	25	32	100	27	26
Nanxiang Town	5	94	70	154	30	42
Xuhang Town	10	147	42	54	22	17
Jiading Industrial Zone	1	83	29	67	17	6
Waigang Town	4	57	23	33	23	13
Jiangqiao Town	9	107	106	149	32	18
Zhenxin Subdistrict	0	59	31	118	24	11
Malu Town	8	109	75	114	38	16
Xincheng Road Subdistrict	0	30	17	74	5	5
Anting Town	6	206	101	184	43	23
Pengpu Town	9	54	42	143	32	13
Jiangning Road Subdistrict	6	28	21	186	44	22
Pengpu Xincun Subdistrict	8	37	33	129	30	5
Caojiadu Subdistrict	7	24	21	154	38	11
Baoshan Road Subdistrict	4	25	17	121	21	8
Linfen Road Subdistrict	6	25	20	98	24	8
Daning Road Subdistrict	8	50	32	102	34	13
Shimen Second Road Subdistrict	0	9	14	94	25	19
West Tianmu Road Subdistrict	2	33	39	45	18	8
North Station Subdistrict	5	22	26	116	10	16
Jing’an Temple Subdistrict	1	24	25	167	76	54
Zhijiangxi Road Subdistrict	4	19	24	101	17	6
West Nanjing Road Subdistrict	0	26	24	156	45	42
Gonghexin Road Subdistrict	11	33	29	145	16	9
Zhujing Town	10	151	35	84	29	18
Jinshan Industrial Zone	3	104	11	23	10	5
Fengjing Town	7	170	27	37	27	13
Lüxiang Town	3	87	10	22	10	12
Zhangyan Town	4	100	6	20	13	12
Tinglin Town	6	159	30	35	18	6
Caojing Town	1	90	10	15	14	3
Langxia Town	1	112	8	5	12	11
Shanyang Town	4	198	46	86	25	10
Petrochemical Subdistrict	6	103	26	77	20	16
Jinshanwei Town	3	133	39	34	19	10
Xinzhuang Industrial Zone	1	45	15	33	5	3
Hongqiao Town	7	84	73	273	62	24
Maqiao Town	2	110	28	73	12	10
Gumei Subdistrict	1	56	29	124	45	8
Xinzhuang Town	9	120	79	241	43	22
Jiangchuan Road Subdistrict	9	123	75	133	25	20
Wujing Town	6	93	38	42	20	12
Huacao Town	8	95	76	100	29	14
Xinhong Subdistrict	4	80	44	69	13	7
Qibao Town	3	99	92	257	47	30
Meilong Town	9	141	87	193	44	23
Pujiang Town	15	397	120	205	41	28
Zhuanqiao Town	12	109	61	169	36	15
Tangzhen Town	8	115	62	88	29	22
Nicheng Town	8	131	33	54	17	12
Nanhui Xincheng Town	1	130	30	72	17	18
Shanggan Xincun Subdistrict	1	36	26	61	22	23
Jinyang Xincun Subdistrict	10	70	46	185	29	7
Sanlin Town	16	182	130	319	76	52
Hudong Xincun Subdistrict	6	39	35	85	23	7
Huamu Subdistrict	17	127	60	257	57	32
Zhuqiao Town	19	226	100	100	63	26
Shuyuan Town	7	117	19	19	16	7
Xinchang Town	5	113	43	46	20	18
Gaoqiao Town	7	94	61	138	39	32
Jinqiao Town	6	46	30	75	13	11
Xuanqiao Town	4	68	31	35	11	11
Lujiazui Subdistrict	7	66	46	170	46	48
Jinqiao Economic and Technological Development Zone	5	100	22	40	15	6
Tangqiao Subdistrict	5	36	24	120	67	8
Huinan Town	10	315	110	220	60	13
Weifang Xincun Subdistrict	9	37	29	139	41	16
Beicai Town	9	128	86	233	53	24
Yangjing Subdistrict	8	69	35	169	34	17
Zhangjiang Hi-Tech Park	2	96	28	56	14	11
Nanmatou Road Subdistrict	0	38	24	106	20	9
Zhangjiang Town	3	148	55	156	25	24
Puxing Road Subdistrict	4	60	42	142	21	4
Kangqiao Town	6	166	86	178	41	12
Gaohang Town	3	81	53	131	27	10
Caolu Town	8	120	76	94	37	26
Heqing Town	13	120	54	60	22	16
Wanxiang Town	3	38	8	12	8	0
Laogang Town	2	58	15	12	8	6
Datuan Town	7	86	31	21	16	11
Zhoupu Town	6	203	68	156	51	11
Chuansha Xinzhen Town	16	293	127	294	76	74
Gaodong Town	6	66	35	57	15	13
Hangtou Town	10	170	53	84	20	10
Zhoujiadu Subdistrict	16	53	30	122	27	14
Waigaoqiao Free Trade Zone	4	107	11	4	1	1
Dongming Road Subdistrict	4	46	37	103	30	9
Changzheng Town	7	63	69	178	47	22
Taopu Town	9	84	47	121	35	14
Ganquan Road Subdistrict	3	18	22	95	22	13
Yichuan Road Subdistrict	12	18	13	81	7	2
Zhenru Town	8	47	47	158	34	18
Changfeng Xincun Subdistrict	2	43	36	118	27	15
Caoyang Xincun Subdistrict	5	20	16	81	14	4
Shiquan Road Subdistrict	3	22	34	119	21	8
Changshou Road Subdistrict	13	34	45	177	31	29
Zhaoxiang Town	3	116	33	97	14	12
Liantang Town	5	138	11	20	29	17
Chonggu Town	1	40	18	28	10	9
Zhujiajiao Town	6	121	30	99	24	30
Huaxin Town	5	124	81	81	32	7
Xujing Town	3	128	66	162	25	14
Xianghuaqiao Subdistrict	5	134	39	53	20	5
Yingpu Subdistrict	1	79	40	110	22	11
Jinze Town	3	145	19	30	16	20
Baihe Town	1	116	21	22	22	10
Xiayang Subdistrict	8	126	44	75	35	26
Xinbang Town	2	87	9	16	12	11
Maogang Town	3	144	9	6	16	3
Xinqiao Town	3	150	62	153	17	19
Songjiang Industrial Zone	0	66	17	19	5	6
Chedun Town	1	94	58	46	24	6
Zhongshan Subdistrict	3	94	53	87	22	16
Sheshan Town	3	119	28	87	12	35
Dongjing Town	8	67	25	69	5	5
Yexie Town	2	93	35	24	24	5
Yongfeng Subdistrict	0	97	45	61	16	14
Fangsong Subdistrict	2	194	101	167	29	23
Yueyang Subdistrict	2	73	48	100	21	26
Sijing Town	1	175	61	113	18	19
Jiuting Town	3	182	113	179	30	12
Xiaokunshan Town	4	52	24	28	11	3
Shihudang Town	3	72	17	9	15	9
Hunan Road Subdistrict	3	22	8	257	36	55
Lingyun Road Subdistrict	5	35	17	61	24	2
Caohejing Hi-Tech Development Zone	1	32	4	8	7	2
Xujiahui Subdistrict	8	52	49	202	65	35
Xietu Road Subdistrict	1	16	23	114	34	12
Fenglin Road Subdistrict	1	31	16	157	76	5
Tianping Road Subdistrict	1	40	13	327	48	47
Longhua Subdistrict	9	23	19	80	19	18
Tianlin Subdistrict	1	22	28	117	41	12
Kangjian Xincun Subdistrict	4	38	14	105	20	8
Huajing Town	7	32	21	40	11	8
Caohejing Subdistrict	8	51	51	156	35	7
Changqiao Subdistrict	6	33	25	71	14	6
Hongmeilu Subdistrict	3	15	13	40	14	2
Siping Road Subdistrict	6	22	25	104	18	5
Pingliang Road Subdistrict	7	27	18	150	22	9
Daqiao Subdistrict	18	19	28	149	53	10
Yanji Xincun Subdistrict	3	21	19	87	11	5
Kongjiang Road Subdistrict	1	17	17	95	25	4
Jiangpu Road Subdistrict	7	18	31	107	32	5
Dinghai Road Subdistrict	18	33	22	74	22	5
Yinxing Subdistrict	22	54	26	109	32	13
Wujiaochang Subdistrict	13	72	61	226	50	11
New Jiangwan City Subdistrict	7	49	11	68	11	5
Changbai Xincun Subdistrict	18	18	14	62	32	8
Wujiaochang Town	6	55	41	183	42	9
Zhoujiaqiao Subdistrict	1	12	9	89	32	8
Xianxia Xincun Subdistrict	1	25	27	109	25	6
Hongqiao Subdistrict	3	39	32	151	67	17
Tianshan Road Subdistrict	8	19	28	99	26	15
Beixinjing Subdistrict	5	14	15	53	40	3
Jiangsu Road Subdistrict	7	9	17	203	44	17
Chengjiaqiao Subdistrict	3	25	9	52	22	9
Xinhua Road Subdistrict	4	16	18	243	62	31
Xinjing Town	11	82	31	196	62	13
Huayang Road Subdistrict	3	20	29	174	34	16
Changxing Town	1	64	37	27	18	9
Shuxin Town	3	63	13	4	12	5
Jianshe Town	6	50	5	7	11	5
Gangyan Town	4	65	7	1	12	4
Shanghai Modern Agricultural Park	0	4	0	3	0	2
Zhongxing Town	6	39	4	0	9	6
Lvhua Town	2	26	2	2	2	3
Hengsha Township	1	58	6	6	11	4
Baotan Town	8	87	19	22	23	6
Dongping Town	4	74	5	40	12	8
Chengqiao Town	2	136	30	96	26	18
Gangxi Town	5	46	4	3	5	8
Xinhai Town	1	35	5	19	5	1
Sanxing Town	2	51	4	2	7	2
Chenjia Town	4	61	13	25	14	9
Miaozhen Town	7	94	8	4	15	5
Qianwei Farm	2	6	0	0	0	1
Xinhe Town	5	52	11	11	18	5
Xincun Township	1	19	0	2	1	1
Xianghua Town	3	34	5	3	11	1
Dongping Forest Farm	0	5	0	3	0	7
Youyi Road Subdistrict	16	72	46	85	47	18
Wusong Subdistrict	6	38	29	100	35	13
Miaoxing Town	1	38	34	61	16	6
Zhangmiao Subdistrict	3	33	43	75	29	14
Luodian Town	5	89	53	110	25	21
Gaojing Town	8	46	38	107	27	9
Yuepu Town	14	64	42	74	22	10
Gucun Town	9	122	114	140	46	23
Yanghang Town	7	105	96	111	25	13
Baoshan City Industrial Park	0	11	8	13	4	0
Songnan Town	8	51	42	72	17	10
Dachang Town	12	127	131	311	67	26
Luojing Town	6	50	19	24	16	10
